# Supplementary material for: The NUDIX hydrolase NUDT5 regulates thiopurine metabolism and cytotoxicity
Source: JCI journal article supplement (doi:10.1172/jci190443), 2025-07-14
Supplement: sd1 [file 1]

## **The NUDIX hydrolase NUDT5 regulates thiopurine metabolism and cytotoxicity**

### **Supplemental Methods**

**Supplemental Table 1: Results of the metabolomics analysis in parental and *NUDT5*<sup>KO</sup> cells.**

**Supplemental Table 2: Common non-coding variants associated with 6-mercaptopurine dose intensity in patients with acute lymphoblastic leukemia and eQTL for *NUDT5*.**

**Supplemental Table 3: Single guide RNA sequences designed for the *NUDT5*-targeted CRISPR/Cas9 screen.**

**Supplemental Table 4: List of primers.**

**Supplemental Figure 1: The overexpression of *NUDT5* in *NUDT5* depleted B-acute lymphoblastic leukemia cells restores thiopurine sensitivity.**

**Supplemental Figure 2: *NUDT5* depletion abolishes the activation of DNA damage response pathway after treatment with 6-mercaptopurine.**

**Supplemental Figure 3: *NUDT5* disruption alters the incorporation of thiopurine active metabolite into DNA after treatment with 6-thioguanine.**

**Supplemental Figure 4: *HPRT1* expression in *NUDT5* knockout cells.**

## Supplemental Methods

### CRISPR/Cas9 screen

A library of 46 sgRNAs targeting the twenty-two *NUDIX* genes was designed and purchased from Millipore Sigma (**Supplemental Table 3**). Two sgRNAs were selected per gene except for *NUDT4* for which two pairs of flanking sgRNAs were designed due to small exon size. Lentivirus was produced by transient transfection into Lenti-X HEK293T packaging cells (Takara, # 632180) with polyethyleneimine (Millipore Sigma). The Nalm6-Cas9 expressing cell line was transduced with low multiplicity-of-infection (MOI < 0.2) to achieve a representation of at least 500 cells per sgRNA. Cells were selected 24 hours after transduction by adding puromycin (5 µg/ml). After recovery, successfully transduced cells were treated for 7 days with 1.5 µM 6-thioguanine (TG). After treatment, genomic DNA was extracted using the Blood and Cell Culture Maxi kit (Qiagen, #13362) per manufacturer's protocol. The sgRNA region was amplified by PCR with dual indexed primers followed by sequencing via Illumina MiSeq for paired-end 100-bp read length. The sgRNA reads count and hits calling were analyzed by the Model-based Analysis of Genome-wide CRISPR-Cas9 Knockout (MAGeCK) algorithm tools available on the Galaxy server (version 0.5.9.5, <https://usegalaxy.eu/>) (1). Log2 fold changes (Log<sub>2</sub>FC) and corresponding *P* values were used for the comparison between tested and control conditions.

### Genomics analysis of *NUDT5* in patients with ALL

For targeted *NUDT5* sequencing, germline DNA was subjected to the generation of Illumina dual-indexed libraries, as previously described (2). All exons of *NUDT5* were captured by pooling the libraries in sets of 96 and were hybridized with customized Roche NimbleGene SeqCap EZ probes (Roche, Roche NimbleGen, Madison, Wisconsin, USA). Quantitative PCR was performed to define the appropriate capture product amplification to efficiently populate an Illumina HiSeq

2000 flow cell for paired end sequencing. Sequencing reads in FASTQ format were mapped and aligned by using the Burrows–Wheeler Aligner, and genetic variations were called by using GATK pipeline, as previously described (3). Only those with genotypes passing GATK quality control and exhibiting call rates greater than 95% were included in further association analyses. Across samples, a depth coverage of greater than 20x was achieved for more than 90% of the targeted regions. Additionally, samples were subjected to genotyping by using the Affymetrix Mapping SNP6 array. We further imputed patient genotypes using TopMed imputation server. Variants found within *NUDT5* or within 100K base pairs upstream of *NUDT5* transcription start site were tested for their association with thiopurine sensitivity.

### **Association of *NUDT5* genetic variants and MP sensitivity in patients with ALL**

An additive multiple regression model was used to evaluate the association between *NUDT5* genetic variants and MP dose intensity (DI) during maintenance therapy. Each variant's genotype was considered as a continuous variable and coded as 0,1 or 2 based on the number of copies of the variant allele carried by the individual. Population structure was included as covariate. In each permutation step, we randomly shuffled the patients' phenotype, and the same multiple regression was performed for each variant. The adjusted *P* value is the number of times the observed *P* value is equal or less than those generated by permutation. A total of 1000 permutations were performed. A *cis*-eQTL analysis was conducted by retrieving variants from the public database eQTLGen (4) and variants with a *P* value < 0.0001 were considered eQTL for *NUDT5*. SNPs were only included in the permutation analysis if they were located at putative enhancer region according to HaploReg v.4 database (5).

**Supplemental Table 1: Results of the metabolomics analysis in parental and *NUDT5*<sup>KO</sup> cells.**

| <b>Metabolite</b>                                     | <b>log2(Fold-Change <i>NUDT5</i><sup>KO</sup>/parental cell line)</b> | <b>Adjusted P-value (False Discovery Rate)</b> |
|-------------------------------------------------------|-----------------------------------------------------------------------|------------------------------------------------|
| 5-Hydroxyindoleacetic acid                            | -2.4957                                                               | 0.0000981                                      |
| Linoleyl Carnitine                                    | -2.5442                                                               | 0.00012417                                     |
| Hypoxanthine                                          | 8.6614                                                                | 0.00042292                                     |
| Myristoyl-L-carnitine                                 | -3.8289                                                               | 0.00042292                                     |
| Palmitoyl-L carnitine                                 | -1.8204                                                               | 0.00042292                                     |
| Beta-nicotinamide D-ribonucleotide                    | -0.97857                                                              | 0.00042292                                     |
| Uridine diphosphate glucose                           | -1.3422                                                               | 0.0006499                                      |
| Uracil                                                | -0.64962                                                              | 0.00083725                                     |
| Uridine diphosphate                                   | -1.2501                                                               | 0.0031108                                      |
| Guanosine                                             | 4.0345                                                                | 0.003295                                       |
| Uridine diphosphate-N-acetylglucosamine               | -0.83362                                                              | 0.0039466                                      |
| Uridine                                               | -0.61116                                                              | 0.0039466                                      |
| 5-Aminoimidazole-4-carboxamide ribonucleotide (AICAR) | 0.79477                                                               | 0.0039832                                      |
| Creatine                                              | -0.8662                                                               | 0.0058391                                      |
| Cytidine                                              | -0.6931                                                               | 0.006482                                       |
| Propionyl-L-carnitine                                 | -0.93111                                                              | 0.0075318                                      |
| Cytidine diphosphate                                  | -0.93718                                                              | 0.013313                                       |
| Acetyl-CoA                                            | 1.5198                                                                | 0.017262                                       |
| Nicotinic acid mononucleotide                         | -1.1472                                                               | 0.017262                                       |
| Uridine 5'-monophosphate                              | -1.0484                                                               | 0.017262                                       |
| Agmatine                                              | -0.84985                                                              | 0.017262                                       |
| Hippurate                                             | -0.64604                                                              | 0.017262                                       |
| Taurine                                               | -0.36518                                                              | 0.017262                                       |
| AICA-riboside                                         | 0.71869                                                               | 0.019853                                       |
| Inosine monophosphate                                 | 0.66023                                                               | 0.020872                                       |
| Xanthylic acid                                        | -0.25386                                                              | 0.022378                                       |
| Uridine triphosphate                                  | -0.87821                                                              | 0.031057                                       |
| L-Dihydroorotic acid                                  | -0.8865                                                               | 0.034184                                       |
| Cytidine monophosphate                                | -0.67835                                                              | 0.035835                                       |
| Cytosine                                              | -0.47809                                                              | 0.035835                                       |
| Dihydroxyacetone phosphate                            | -0.54191                                                              | 0.041532                                       |
| Betaine                                               | -0.40107                                                              | 0.04819                                        |
| 3-Hydroxy-3-methylglutaryl-CoA                        | -0.30695                                                              | 0.062979                                       |
| D-Citramalic acid                                     | -0.23836                                                              | 0.067911                                       |
| Adenosine triphosphate                                | 0.35701                                                               | 0.072896                                       |
| Succinic acid                                         | 0.4489                                                                | 0.076152                                       |
| Biotin                                                | -0.51421                                                              | 0.079125                                       |
| Pantothenic acid                                      | -0.23824                                                              | 0.086117                                       |
| dCTP                                                  | 0.86087                                                               | 0.09537                                        |
| Xanthosine                                            | 0.69081                                                               | 0.09537                                        |
| D-Ribose 5-phosphate                                  | -1.055                                                                | 0.10171                                        |
| NADP                                                  | -0.68638                                                              | 0.10171                                        |
| 2-ketoglutaric acid                                   | -0.33939                                                              | 0.10171                                        |
| Choline                                               | 0.47506                                                               | 0.1158                                         |
| L-Homocysteine                                        | -0.40179                                                              | 0.11698                                        |

**Supplemental Table 1: Results of the metabolomics analysis in parental and *NUDT5*<sup>KO</sup> cells (continued).**

| Metabolite                       | log2(Fold-Change <i>NUDT5</i> <sup>KO</sup> /parental cell line) | Adjusted P-value (False Discovery Rate) |
|----------------------------------|------------------------------------------------------------------|-----------------------------------------|
| Putrescine                       | 0.40709                                                          | 0.13071                                 |
| N-Methyl-D-aspartic acid         | 0.31251                                                          | 0.13649                                 |
| Riboflavin                       | 0.4068                                                           | 0.14307                                 |
| Gamma-Aminobutyric acid          | -0.47989                                                         | 0.1663                                  |
| N-Acetyl-D-glucosamine           | -0.4292                                                          | 0.1663                                  |
| L-Aspartic acid                  | 0.41447                                                          | 0.1736                                  |
| Citrulline                       | -0.43929                                                         | 0.1816                                  |
| dCMP                             | -0.33636                                                         | 0.1816                                  |
| NAD                              | -0.31168                                                         | 0.19759                                 |
| Glutamine_2                      | 0.53595                                                          | 0.21126                                 |
| Flavin Mononucleotide            | -0.50941                                                         | 0.21126                                 |
| L-Pipecolic acid                 | 0.4522                                                           | 0.21145                                 |
| S-Adenosylmethionine             | -0.3948                                                          | 0.21145                                 |
| Dimethylglycine                  | 0.27732                                                          | 0.21145                                 |
| N-Phenylacetylglycine            | -0.23589                                                         | 0.23307                                 |
| Citicoline                       | 0.27667                                                          | 0.24617                                 |
| Glucuronic acid                  | -0.42196                                                         | 0.25424                                 |
| L-Kynurenine                     | -0.22464                                                         | 0.25424                                 |
| Malonyl-L-carnitine              | -1.1174                                                          | 0.26268                                 |
| Serine                           | -0.40307                                                         | 0.26943                                 |
| Thiamine                         | 0.22707                                                          | 0.26943                                 |
| dAMP                             | -0.34371                                                         | 0.27224                                 |
| Cystathionine                    | 0.28424                                                          | 0.27737                                 |
| N-Acetylputrescine               | -0.26672                                                         | 0.27737                                 |
| Imidazole                        | 0.97273                                                          | 0.29403                                 |
| N-Acetyl-glucosamine 1-phosphate | -0.6043                                                          | 0.31154                                 |
| Pyridoxal 5'-phosphate           | -0.30945                                                         | 0.31154                                 |
| Adenine                          | -0.25316                                                         | 0.31154                                 |
| Lysine                           | -0.22388                                                         | 0.31154                                 |
| N-Acetylornithine                | -0.20514                                                         | 0.31154                                 |
| Glutathione                      | -0.15201                                                         | 0.31154                                 |
| Asymmetric dimethylarginine      | -0.19998                                                         | 0.31554                                 |
| Creatinine                       | -0.22531                                                         | 0.32153                                 |
| Sucrose                          | 0.8356                                                           | 0.34658                                 |
| Deoxyuridine                     | 0.54009                                                          | 0.34658                                 |
| dTMP                             | -0.30432                                                         | 0.34658                                 |
| S-Adenosylhomocysteine           | -0.26558                                                         | 0.34658                                 |
| Arginine                         | -0.24671                                                         | 0.34658                                 |
| Gluconic acid                    | -0.22869                                                         | 0.34658                                 |
| Valeryl-L carnitine              | -0.22352                                                         | 0.34658                                 |
| cis aconitic acid                | -0.21621                                                         | 0.34658                                 |
| 2-Ketohexanoic acid              | -0.15001                                                         | 0.34658                                 |
| L-Glutamic acid                  | 0.22749                                                          | 0.34874                                 |
| pyridoxine                       | -0.40653                                                         | 0.36839                                 |

**Supplemental Table 1: Results of the metabolomics analysis in parental and *NUDT5*<sup>KO</sup> cells (continued).**

| Metabolite                   | log2(Fold-Change<br><i>NUDT5</i> <sup>KO</sup> /parental cell line) | Adjusted P-value (False<br>Discovery Rate) |
|------------------------------|---------------------------------------------------------------------|--------------------------------------------|
| N-Acetylglutamine            | -0.21668                                                            | 0.36839                                    |
| Sorbitol                     | -0.18316                                                            | 0.36839                                    |
| GDP                          | -0.14027                                                            | 0.36839                                    |
| L-Acetylcarnitine            | -0.13922                                                            | 0.36839                                    |
| Glucose 1-phosphate          | -0.22407                                                            | 0.37196                                    |
| L-Proline                    | -0.18815                                                            | 0.38482                                    |
| Xanthine                     | -0.53849                                                            | 0.38525                                    |
| Phenyllactic acid            | -0.098292                                                           | 0.39858                                    |
| Histidine                    | -0.086132                                                           | 0.39858                                    |
| dTTP                         | -0.26861                                                            | 0.40406                                    |
| N-Alpha-acetyllysine         | -0.17414                                                            | 0.42428                                    |
| Carnitine                    | 0.11528                                                             | 0.44287                                    |
| GMP                          | -0.17005                                                            | 0.47261                                    |
| Argininosuccinic acid        | -0.22944                                                            | 0.48377                                    |
| dGDP                         | -0.18389                                                            | 0.49451                                    |
| N-Acetyl-L-alanine           | 0.19831                                                             | 0.50196                                    |
| Imidazoleacetic acid         | -0.18827                                                            | 0.50196                                    |
| dGMP                         | 0.14962                                                             | 0.50196                                    |
| Urea                         | -0.12853                                                            | 0.50196                                    |
| Adenosine                    | -0.21359                                                            | 0.50989                                    |
| L-Malic acid                 | 0.07558                                                             | 0.51502                                    |
| dATP                         | 0.25364                                                             | 0.53785                                    |
| Phosphorylcholine            | 0.19527                                                             | 0.54477                                    |
| L-Asparagine                 | -0.10347                                                            | 0.54477                                    |
| 4-Hydroxyproline             | -0.077474                                                           | 0.58785                                    |
| Kynurenic acid               | -0.23075                                                            | 0.60512                                    |
| Deoxyribose 5-phosphate      | 0.10266                                                             | 0.60512                                    |
| Taurodeoxycholic acid        | -0.5132                                                             | 0.62435                                    |
| D-Glyceraldehyde 3-phosphate | 0.23021                                                             | 0.65451                                    |
| Spermidine                   | -0.22547                                                            | 0.65451                                    |
| Cyclic AMP                   | -0.20888                                                            | 0.67232                                    |
| Picolinic acid               | -0.1569                                                             | 0.67232                                    |
| Leucine                      | 0.13548                                                             | 0.67232                                    |
| L-Alanine                    | -0.074475                                                           | 0.67232                                    |
| CDP-ethanolamine             | 0.071345                                                            | 0.67232                                    |
| AMP                          | 0.10197                                                             | 0.67383                                    |
| Nicotinamide                 | -0.14851                                                            | 0.68004                                    |

**Supplemental Table 1: Results of the metabolomics analysis in parental and *NUDT5*<sup>KO</sup> cells (continued).**

| Metabolite                      | log2(Fold-Change<br><i>NUDT5</i> <sup>KO</sup> /parental cell line) | Adjusted P-value (False<br>Discovery Rate) |
|---------------------------------|---------------------------------------------------------------------|--------------------------------------------|
| L-Tryptophan                    | -0.087426                                                           | 0.6891                                     |
| D-Sedoheptulose 7-phosphate     | -0.24552                                                            | 0.69072                                    |
| L-Histidinol                    | 0.18883                                                             | 0.69072                                    |
| Ornithine                       | -0.11562                                                            | 0.69227                                    |
| D-Erythrose 4-phosphate         | -0.11024                                                            | 0.71068                                    |
| Fumaric acid                    | 0.065943                                                            | 0.72324                                    |
| Aminoadipic acid                | 0.060042                                                            | 0.76869                                    |
| Fructose 1,6-bisphosphate       | -0.40894                                                            | 0.76987                                    |
| dTDP                            | -0.10804                                                            | 0.76987                                    |
| L-2-Hydroxyglutaric acid        | -0.086908                                                           | 0.78958                                    |
| Guanosine triphosphate          | -0.064539                                                           | 0.78958                                    |
| Cytidine triphosphate           | 0.051272                                                            | 0.78958                                    |
| Threonine                       | -0.046978                                                           | 0.78958                                    |
| Lauroyl-L carnitine             | -0.040914                                                           | 0.78958                                    |
| Uric acid                       | -0.088366                                                           | 0.79308                                    |
| Sarcosine                       | -0.057588                                                           | 0.81798                                    |
| FAD                             | -0.066603                                                           | 0.83542                                    |
| Isoleucine                      | 0.090477                                                            | 0.8388                                     |
| Cholesterol sulfate             | 0.057933                                                            | 0.87432                                    |
| Serotonin                       | 0.04461                                                             | 0.87432                                    |
| 1-Methylhistidine               | -0.021549                                                           | 0.87432                                    |
| ADP                             | 0.021582                                                            | 0.87738                                    |
| Glycine                         | 0.029114                                                            | 0.87754                                    |
| N-Acetylglutamic acid           | -0.028722                                                           | 0.88096                                    |
| Stearoyl-L-carnitine            | 0.025266                                                            | 0.88096                                    |
| Taurochenodesoxycholic acid     | 0.021283                                                            | 0.88096                                    |
| Spermine                        | 0.042981                                                            | 0.89345                                    |
| Perfluoroheptanoic acid         | 0.098377                                                            | 0.91436                                    |
| Folic acid                      | -0.05498                                                            | 0.91436                                    |
| Thiamine pyrophosphate          | -0.065266                                                           | 0.93085                                    |
| aminolevulinic acid             | 0.030479                                                            | 0.95876                                    |
| Indole                          | 0.00042574                                                          | 0.97777                                    |
| Ursodeoxycholic acid            | -0.0067958                                                          | 0.98147                                    |
| 2-Oxo-4-methylthiobutanoic acid | 0.023782                                                            | 0.98803                                    |
| L-Valine                        | 0.019802                                                            | 0.98803                                    |
| Methionine sulfoxide            | -0.0094795                                                          | 0.98829                                    |
| Deoxycytidine                   | 0.0040245                                                           | 0.98829                                    |
| Tyrosine                        | 0.0074121                                                           | 0.99603                                    |
| Phenylalanine                   | 0.01403                                                             | 0.99822                                    |
| Coenzyme A                      | -0.050624                                                           | 0.99852                                    |

**Supplemental Table 2: Common non-coding variants associated with 6-mercaptopurine dose intensity in patients with acute lymphoblastic leukemia and eQTL for *NUDT5*.**

| Variant           | Genomic position (hg19) | MAF <sub>cohort</sub> | Base change | Gene function                               | Nominal <i>P</i> value <sup>a</sup> | Permutation <i>P</i> value <sup>b</sup> | Gene expression <i>P</i> value <sup>c</sup> | Gene expression score <sup>d</sup> |
|-------------------|-------------------------|-----------------------|-------------|---------------------------------------------|-------------------------------------|-----------------------------------------|---------------------------------------------|------------------------------------|
| <b>rs55713253</b> | 10:12305358             | 0.0589                | C>T         | Intergenic ( <i>CD123</i> ; <i>CAMK1D</i> ) | 0.00186                             | <b>0.036</b>                            | $4.7 \times 10^{-19}$                       | 8.9                                |
| <b>rs11257611</b> | 10:12282827             | 0.0574                | C>T         | Intronic ( <i>CDC123</i> )                  | 0.0275                              | 0.268                                   | $5.4 \times 10^{-13}$                       | 7.2                                |
| <b>rs11818932</b> | 10:12288366             | 0.0566                | G>T         | Intronic ( <i>CDC123</i> )                  | 0.0303                              | 0.292                                   | $5.0 \times 10^{-17}$                       | 8.4                                |
| <b>rs11818953</b> | 10:12288444             | 0.0566                | G>C         | Intronic ( <i>CDC123</i> )                  | 0.0303                              | 0.292                                   | $1.1 \times 10^{-16}$                       | 8.3                                |

<sup>a</sup> Nominal *P* value was calculated according to the multiple regression model adjusting for population structure as covariate.

<sup>b</sup> *P* values of the permutation-based analysis to account for multiple testing. A *P* < 0.05 was considered significant.

<sup>c</sup> Corrected *P* values for the association between genotype and gene expression scores were retrieved from the public gene expression database eQTLGen. SNPs were only included if they were located at putative enhancer region according to HaploReg database.

<sup>d</sup> Gene expression scores in blood cells were retrieved from the eQTLGen database.

Abbreviations: eQTL, expression quantitative trait loci; MAF, minor allele frequency.

**Supplemental Table 3: Single guide RNA sequences designed for the *NUDIX*-targeted CRISPR/Cas9 screen.**

| <b>sgRNA identifier</b> | <b>Sequence (5'-3')</b> | <b>sgRNA identifier</b> | <b>Sequence (5'-3')</b> |
|-------------------------|-------------------------|-------------------------|-------------------------|
| NUDT1-1                 | CGCCCATGCTGGTTCCAGC     | NUDT12-1                | ATCAATTGTCAATAAATCA     |
| NUDT1-2                 | GTGGCCCGACGACAGCTAC     | NUDT12-2                | CTTCATTCGTTAGGAACCA     |
| NUDT2-1                 | ATCCTCTCCTGGTTCCACA     | NUDT13-1                | ATTCAGGTTTGTGTAAGG      |
| NUDT2-2                 | GCCCTGAGGGAGACCCAAG     | NUDT13-2                | ACTCTTCAACTCAATGCA      |
| NUDT3-1                 | TAGTCGCCATCCAGACAGA     | NUDT14-1                | GAAGAGTTGAATAAGAGAA     |
| NUDT3-2                 | CTGGAGTAAAAGGGACATT     | NUDT14-2                | TACAGCTGCTAGGGACCCT     |
| NUDT4-1                 | TAGAGTTATAACCTTGCGAG    | NUDT15-1                | CAGATGACCTCCAGGGAGT     |
| NUDT4-2                 | CAGTTATGGTTCACCTTAC     | NUDT15-2                | CTTTGAGCACATTCTTCCC     |
| NUDT4-3                 | TTTCACACAAATTCTGTTT     | NUDT16-1                | CGTGGCCCTGACCCGACGT     |
| NUDT4-4                 | TAACACTAAGACAGCGAGA     | NUDT16-2                | TCCTCGAGCGTCAGACGCT     |
| NUDT5-1                 | AAGTGTTCTCTGCAGCACG     | NUDT17-1                | CTGCAGCTTGAAGCGAGGA     |
| NUDT5-2                 | CACTATGAGTGTATCGTTC     | NUDT17-2                | CCCCCTTCTGCCCTTTTG      |
| NUDT6-1                 | AAAATATGTGGAAGTTTCC     | NUDT18-1                | CTGGCTCCATTCTCCCCGC     |
| NUDT6-2                 | ATCTTCTTCAGGCTCTGAC     | NUDT18-2                | GCGCTGCAGCGGGAGGTGA     |
| NUDT7-1                 | CCGACGGTGAACAACAAA      | NUDT19-1                | GAAGCCCTCGGCCGGCGGC     |
| NUDT7-2                 | TACTCCGTCCTTTTGCCAT     | NUDT19-2                | TGCAGCGCTCCCCGCACCA     |
| NUDT8-1                 | CCAGGCGGCAAGTGCGACC     | NUDT20-1                | AGGGGTACCTAGCAAAATC     |
| NUDT8-2                 | GTGGTGACACGGCCCTGC      | NUDT20-2                | CTTTATTTACTTTTCCTTT     |
| NUDT9-1                 | TTGAGAGAAAGAGCAAGAA     | NUDT21-1                | CTGGGTAAAGTTCACCACC     |
| NUDT9-2                 | CCTGCAGGACGGACTGGAC     | NUDT21-2                | CTGGTGGTGAACCTTAACCC    |
| NUDT10-1                | ACACGTACGTTCTGTGCTT     | NUDT22-1                | GCTCAGGGTGAGCAGCGGC     |
| NUDT10-2                | GTCCGAGAGGTGTACGAAG     | NUDT22-2                | CCCGAAATGAGACCAGTGC     |
| NUDT11-1                | CGAGAGGTGTACGAAGAAG     |                         |                         |
| NUDT11-2                | CGAAGAAGCGGGAGTCAAG     |                         |                         |

Abbreviations: sgRNA, single guide-RNA; NUDT, NUDIX hydrolase

**Supplemental Table 4: List of primers.**

| Use                                     | Name                                             | 5'-3' sequence                                                                                                                                                                                                                                                                                                                                  |
|-----------------------------------------|--------------------------------------------------|-------------------------------------------------------------------------------------------------------------------------------------------------------------------------------------------------------------------------------------------------------------------------------------------------------------------------------------------------|
| CRISPR/Cas9 editing, cloning into pX458 | hNUDT5-KO-guide1F                                | CACCGGAAGTGTTCTCTGCAGCACG                                                                                                                                                                                                                                                                                                                       |
|                                         | hNUDT5-KO-guide1R                                | AAACCGTGCTGCAGAGAACACTTCC                                                                                                                                                                                                                                                                                                                       |
| TIDE sequencing                         | NUDT5-F1                                         | GCCACACGCTGGAAAGTGGT                                                                                                                                                                                                                                                                                                                            |
|                                         | NUDT5-R1                                         | CTGGAGGAGCCTCGCTACGA                                                                                                                                                                                                                                                                                                                            |
| NUDT5 overexpression                    | FLAG-NUDT5-F                                     | GATTACAAGGATGACGACGATAAGGAGAGCCAAG<br>AACCAACGGA                                                                                                                                                                                                                                                                                                |
|                                         | FLAG-NUDT5-R                                     | GGATCCCTAGGAATTTTAAAATTTCAAGAAGGGCA                                                                                                                                                                                                                                                                                                             |
| Cloning into cl20c-IRES-mCherry         | NUDT5-EcoRI-F                                    | CTTCTCTAGGCGCCGGGCCACCATGGATTACAAG                                                                                                                                                                                                                                                                                                              |
|                                         | NUDT5-EcoRI-R                                    | GGATCCCTAGGAATTTTAAAATTTCAAGAAGGGCA                                                                                                                                                                                                                                                                                                             |
| Dual-luciferase reporter assay          | rs55713253-REF Reference sequence (hg19)         | CTGAATTCAAGCAATTCTCCTGCCTTAGCCTCCTG<br>AGTAGCTGGGACCAAAGAGGTACACCACGACATC<br>TGGCTAATTTTTGTATTTTTAGTAGAAATGGGGTTT<br>CACCATATTGGCCAGGCTGGTCTCCAACCTCCTGAC<br>CTCAAGTGATCAGCCATCTTGGCCTCCCAAAGTGC<br>TGGGGTTACAGGCATAAGCCACTGTGCCCCGTACA<br>TAATTCTCATTTTTAAAAAACTTTTTATTTTTATTTTT<br>GCAGAACTGTCAAACCTCTTCCTCAAATTTTCTTCC<br>TATTTTATGATTGCTGAC |
|                                         | rs55713253-ALT Alternative sequence with variant | CTGAATTCAAGCAATTCTCCTGCCTTAGCCTCCTG<br>AGTAGCTGGGACCAAAGAGGTACACCACGACATC<br>TGGCTAATTTTTGTATTTTTAGTAGAAATGGGGTTT<br>CACCATATTGGCCAGGCTGGTCTCCAACCTCCTGAC<br>CTCAAGTGATCAGCCATCTTGGCCTCCCAAAGTGC<br>TGGGGTTACAGGCATAAGCCACTGTGCCCCGTACA<br>TAATTCTCATTTTTAAAAAACTTTTTATTTTTATTTTT<br>GCAGAACTGTCAAACCTCTTCCTCAAATTTTCTTCC<br>TATTTTATGATTGCTGAC |
|                                         | Forward primer                                   | CTAGCAAAATAGGCTGTCCC                                                                                                                                                                                                                                                                                                                            |

## Supplemental Figures

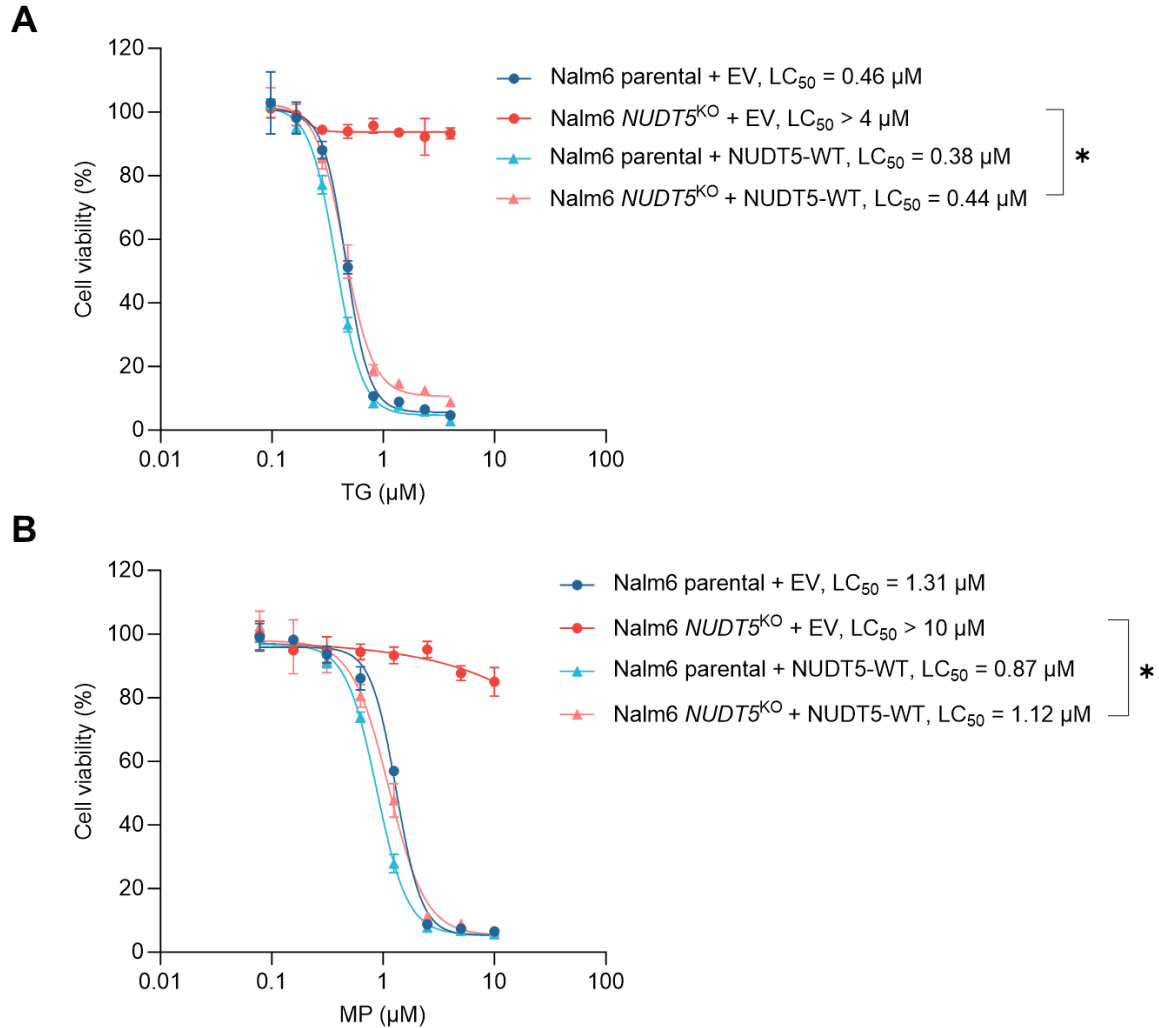

**Supplemental Figure 1: The overexpression of *NUDT5* in *NUDT5* depleted B-acute lymphoblastic leukemia cells restored thiopurine sensitivity.**

Overexpression of *NUDT5* in *NUDT5*<sup>KO</sup> cells treated with TG (**A**) and MP (**B**). Abbreviations: ALL, acute lymphoblastic leukemia; EV, empty vector;  $\text{LC}_{50}$ : lethal concentration 50; MP, 6-mercaptopurine; *NUDT5*, NUDIX hydrolase 5; sgRNA, single guide RNA; TG, 6-thioguanine; WT, wildtype. Data are represented as mean  $\pm$  standard deviation ( $n = 3$ ). A two tailed paired t-test was used for the statistical comparisons between groups. \*  $P < 0.05$ ; \*\*  $P$  value  $< 0.01$ .

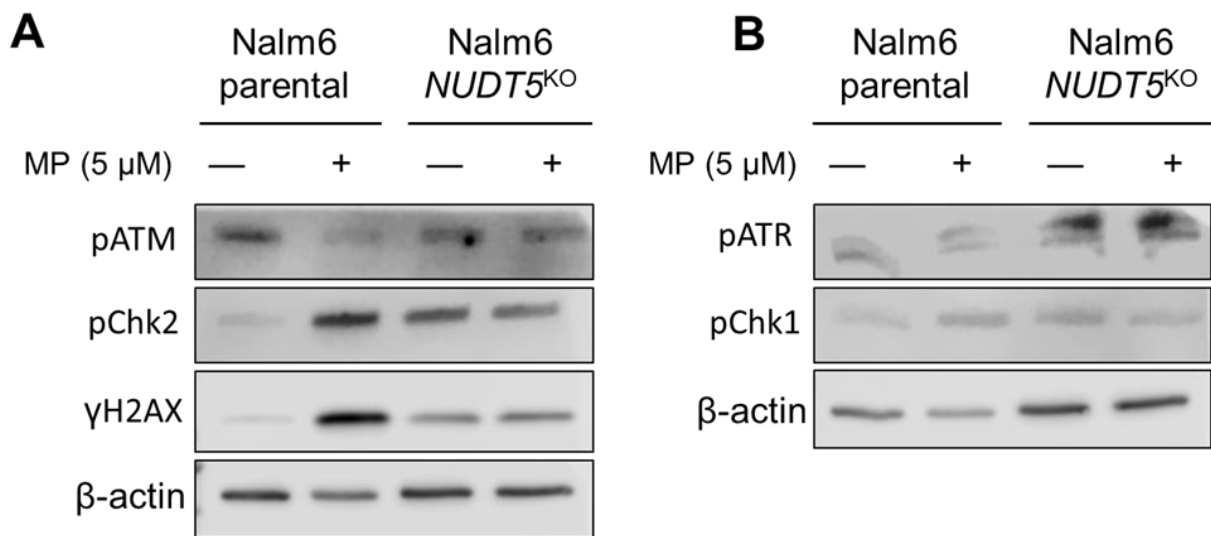

**Supplemental Figure 2: NUDT5 depletion abolishes the activation of DNA damage response pathway after treatment with 6-mercaptopurine.**

(**A** and **B**) Western blots showing the phosphorylation of DNA double strands breaks sensors ATM/ATR (pATM and pATR, respectively), and activated effectors Chk2, Chk1 and histone 2A (pChk2, pChk1 and γH2AX, respectively), after 24 hours of MP (5 μM) in parental and *NUDT5*<sup>KO</sup> Nalm6 cells. β-actin was used as loading control. Abbreviations: γH2AX, phosphorylated histone 2A; MP, 6-mercaptopurine; NUDT5, NUDIX hydrolase 5; pATM/pChk2, phosphorylated ataxia-telangiectasia mutated/checkpoint kinase 2; pATR/pChk1, phosphorylated ataxia telangiectasia and Rad3-related/checkpoint kinase 1.

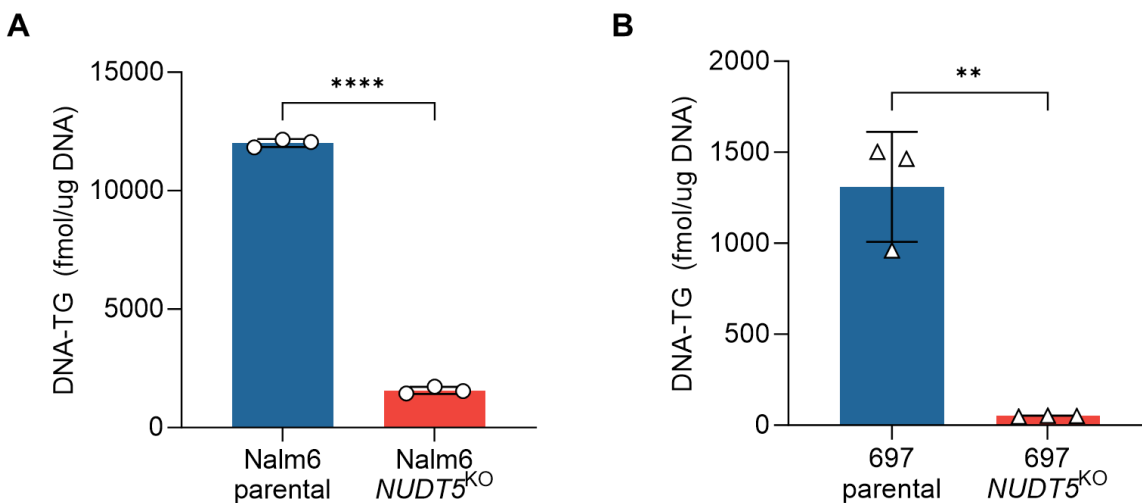

**Supplemental Figure 3: NUDT5 disruption alters the incorporation of thiopurine active metabolite into DNA after treatment with 6-thioguanine.**

DNA-TG concentrations were measured in parental and *NUDT5*<sup>KO</sup> Nalm6 (**A**) and 697 (**B**) cells after treatment with 5  $\mu$ M of TG for 24 hours. Abbreviations: DNA-TG, DNA-thioguanine; NUDT5, NUDIX hydrolase 5; TG, 6-thioguanine. Data are represented as mean  $\pm$  standard deviation (n = 3). *P* value of two-tailed unpaired t-test. \* *P* < 0.05; \*\* *P* < 0.01.

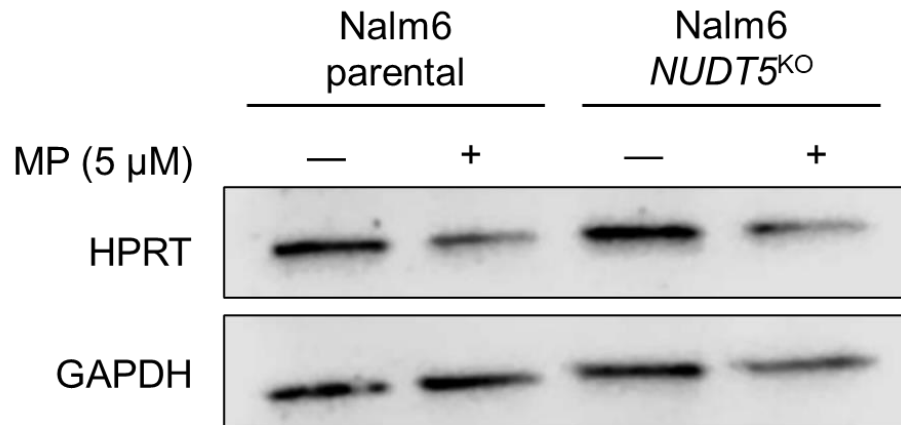

**Supplemental Figure 4: *HPRT1* expression in *NUDT5* knockout cells.**

The expression of *HPRT1* was verified by western blot in absence and presence of MP for 24 hours. Abbreviations: HPRT, hypoxanthine-guanine phosphoribosyl transferase; GAPDH, glyceraldehyde 3-phosphate dehydrogenase; MP, 6-mercaptopurine; *NUDT5*, NUDIX hydrolase 5.

## References

1. Li W, et al. MAGECK enables robust identification of essential genes from genome-scale CRISPR/Cas9 knockout screens. *Genome Biol.* 2014;15(12):554.
2. Yang JJ, et al. Inherited *NUDT15* variant is a genetic determinant of mercaptopurine intolerance in children with acute lymphoblastic leukemia. *J Clin Oncol.* 2015;33(11):1235–42.
3. Moriyama T, et al. Comprehensive characterization of pharmacogenetic variants in TPMT and NUDT15 in children with acute lymphoblastic leukemia. *Pharmacogenet Genomics.* 2022;32(2):60-6.
4. Võsa U, et al. Large-scale cis- and trans-eQTL analyses identify thousands of genetic loci and polygenic scores that regulate blood gene expression. *Nat Genet.* 2021;53(9):1300-10.
5. Ward LD, and Kellis M. HaploReg v4: systematic mining of putative causal variants, cell types, regulators and target genes for human complex traits and disease. *Nucleic Acids Res.* 2016;44(D1):D877-81.
